# Supplementary material for: Cytological Assessments and Transcriptome Profiling Demonstrate that Evodiamine Inhibits Growth and Induces Apoptosis in a Renal Carcinoma Cell Line
Source: PubMed Central journal article supplement (PMC5626725; doi:10.1038/s41598-017-12918-y), 2017-10-03
Supplement: 41598_2017_12918_MOESM1_ESM.pdf [file 41598_2017_12918_MOESM1_ESM.pdf]

# **Cytological Assessments and Transcriptome Profiling Demonstrate that Evodiamine Inhibits Growth and Induces Apoptosis in a Renal Carcinoma Cell Line**

Xiao-Long Yuan<sup>1</sup>, Peng Zhang<sup>1</sup>, Xin-Min Liu<sup>1</sup>, Yong-Mei Du<sup>1</sup>, Xiao-Dong Hou<sup>1</sup>, Sen Cheng<sup>2</sup> & Zhong-Feng Zhang<sup>1,\*</sup>

<sup>1</sup> Tobacco Research Institute of Chinese Academy of Agricultural Sciences, Qingdao, China. <sup>2</sup> Shanghai Tobacco Group Company Limited, Shanghai, China.

\*Correspondence and requests for materials should be addressed to Z.-F. Z. (email: [zhangzhongfeng@caas.cn](mailto:zhangzhongfeng@caas.cn))



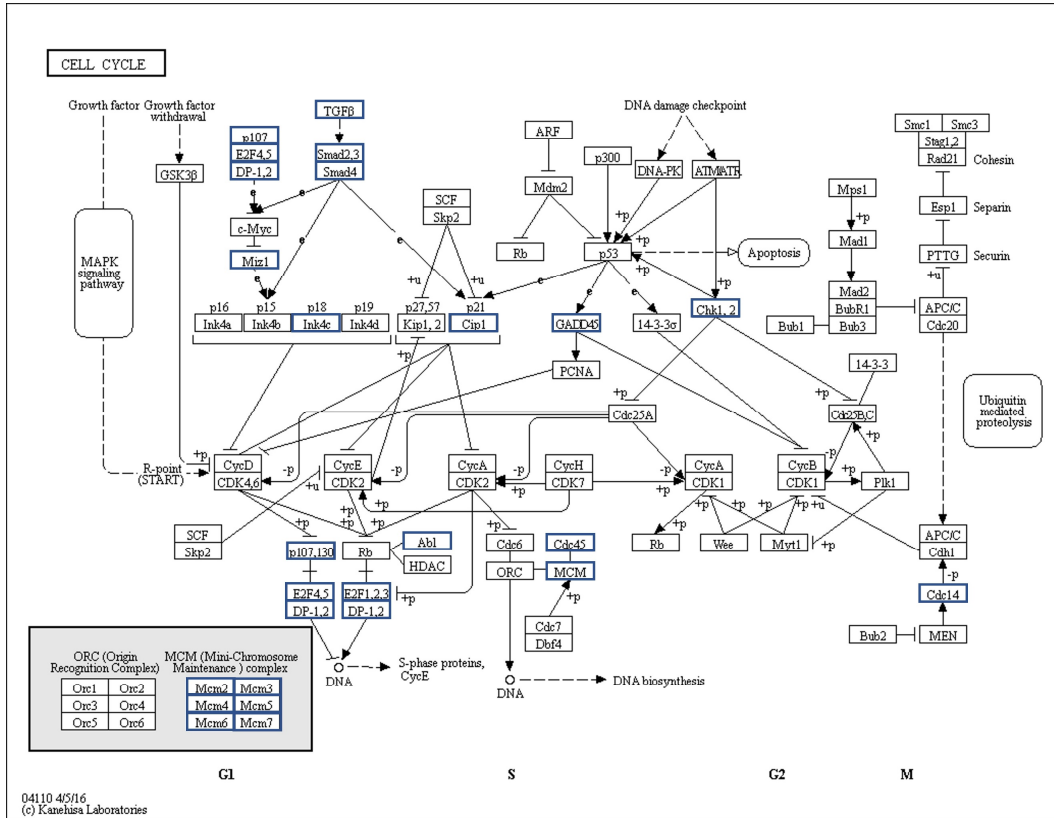

Figure S2 Schematic diagram of differentially expressed genes involved in the cell cycle by KEGG<sup>1-3</sup>. ([http://www.kegg.jp/kegg-bin/show\\_pathway?map04110](http://www.kegg.jp/kegg-bin/show_pathway?map04110))

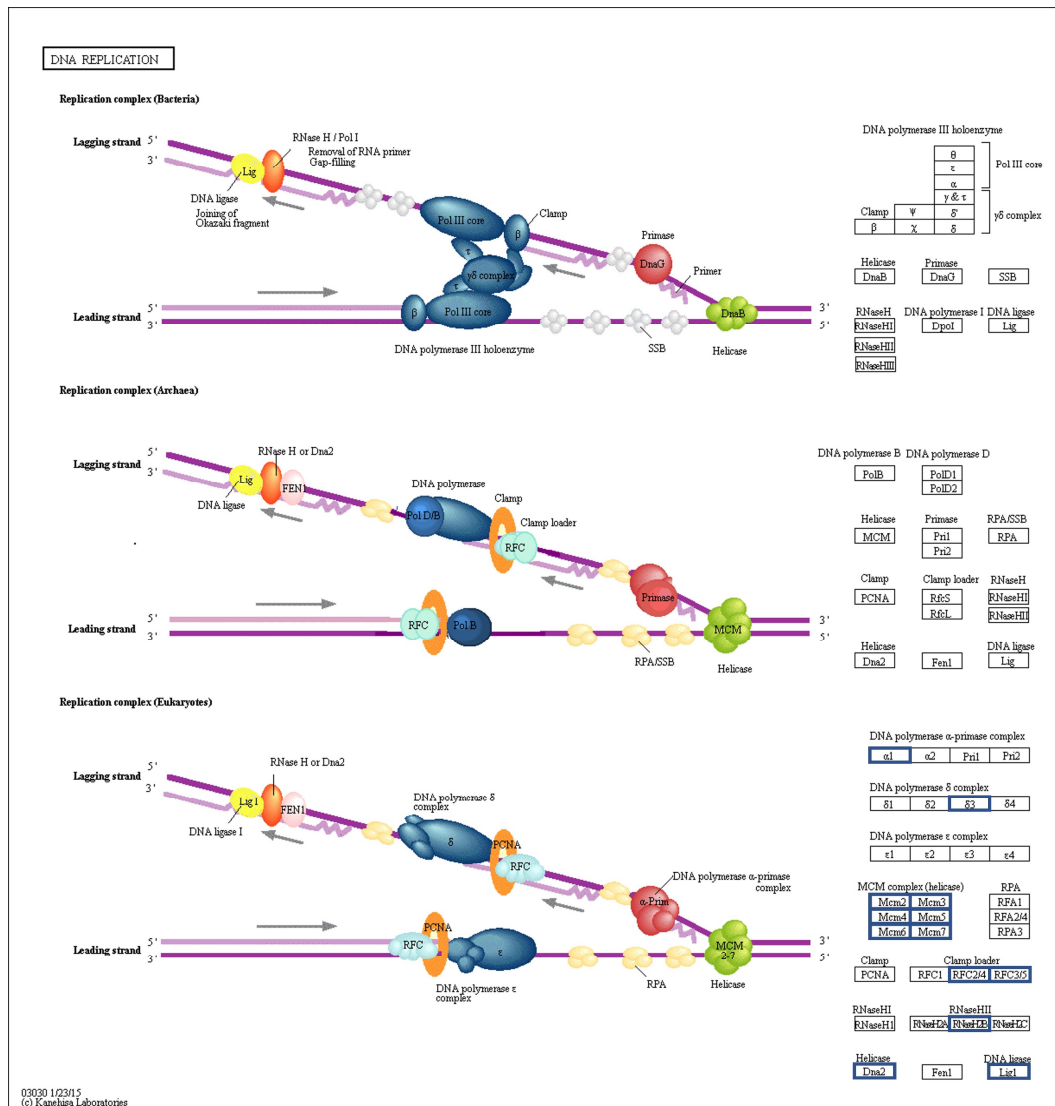

Figure S3 Schematic diagram of differentially expressed genes involved in the DNA replication by KEGG<sup>1-3</sup>. ([http://www.kegg.jp/kegg-bin/show\\_pathway?map03030](http://www.kegg.jp/kegg-bin/show_pathway?map03030))

## References

- 1 Kanehisa, M. *et al.* KEGG: new perspectives on genomes, pathways, diseases and drugs. *Nucleic Acids Research* **45**, D353-D361 (2017)
- 2 Kanehisa, M. *et al.* KEGG as a reference resource for gene and protein annotation. *Nucleic Acids Research* **44**, D457-D462 (2016).
- 3 Kanehisa, M. & Goto, S. KEGG: Kyoto Encyclopedia of Genes and Genomes. *Nucleic Acids Research* **28**, 27-30 (2000).
